# Supplementary material
Source: PubMed Central journal article supplement (PMC6247987)
Supplement: Supp_Fig1.pdf [file Supp_Fig1.pdf]

## Supplementary Data

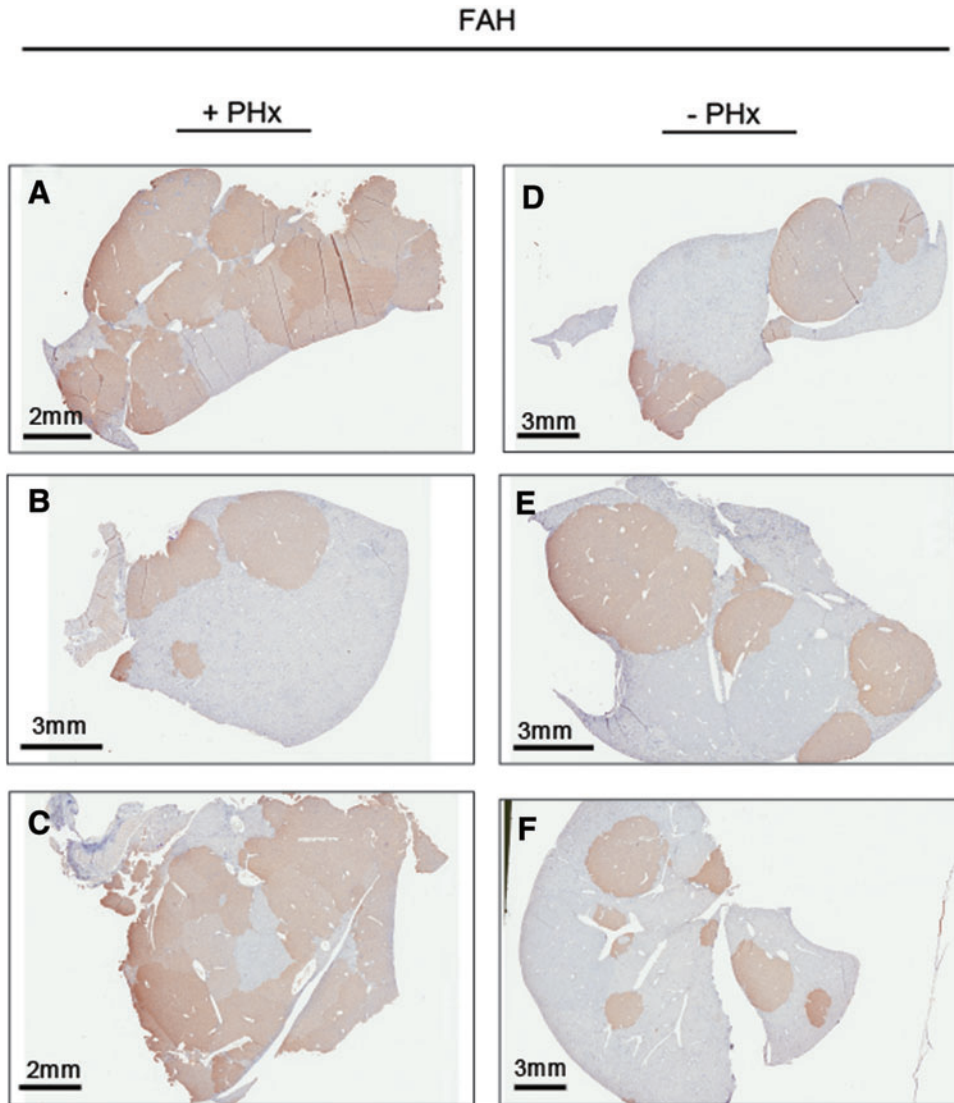

**Supplementary Figure S1.** Representative FAH histology from each mouse that had (+PHx) or had not (-PHx) undergone partial hepatectomy.
