# Supplementary material
Source: PubMed Central journal article supplement (PMC6247987)
Supplement: Supp_Fig2.pdf [file Supp_Fig2.pdf]

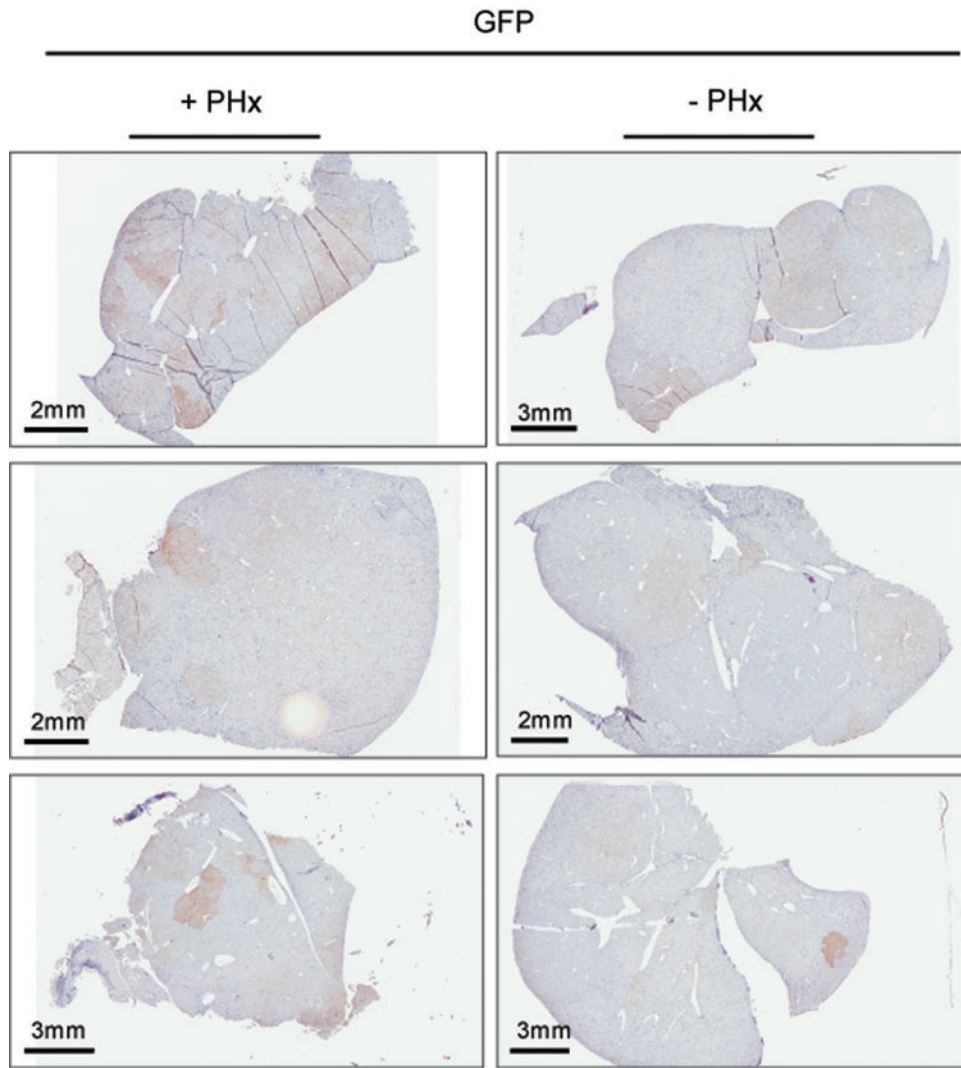

**Supplementary Figure S2.** Representative GFP histology from each mouse that had (+PHx) or had not (-PHx) undergone partial hepatectomy.
